# Supplementary material for: Reporter emission multiplexing in digital PCRs (REM-dPCRs): direct quantification of multiple target sequences per detection channel by population specific reporters
Source: Royal Society of Chemistry journal article supplement (doi:10.1039/d3an00191a), 2023-01-01
Supplement: d3an00191a1.pdf [file d3an00191a1.pdf]

## Supplementary Material

# Reporter emission multiplexing in digital PCR (REM-dPCR): Direct quantification of multiple target sequences per detection channel by population specific reporter

Silvia Calabrese<sup>‡a</sup>, Anja M. Markl<sup>‡a, b</sup>, Maximilian Neugebauer<sup>a, c</sup>, Stefanie J. Krauth<sup>d, e</sup>, Nadine Borst<sup>a, c</sup>, Felix von Stetten<sup>\*, a, c</sup>, Michael Lehnert<sup>a</sup>

<sup>a</sup> Hahn-Schickard, 79110 Freiburg, Germany

<sup>b</sup> Faculty of Chemistry and Pharmacy, Albert-Ludwigs-Universität Freiburg, 79104 Freiburg, Germany

<sup>c</sup> Laboratory for MEMS Applications, IMTEK-Department of Microsystems Engineering, University of Freiburg, 79110 Freiburg, Germany

<sup>d</sup> School of Biodiversity, One Health, and Veterinary Medicine, University of Glasgow, Glasgow, UK

<sup>e</sup> School of Health and Wellbeing, General Practice and Primary Care, University of Glasgow, Glasgow, UK

### Corresponding Author

Name: Felix von Stetten

Institute: University of Freiburg, IMTEK-Department of Microsystems Engineering

Email: [vstetten@imtek.de](mailto:vstetten@imtek.de)

Phone: +49 761 203 73243

### Table of contents

|                                                                                                                            |    |
|----------------------------------------------------------------------------------------------------------------------------|----|
| Supplemental Table S1: Target panel. ....                                                                                  | 2  |
| Supplemental Table S2: Oligonucleotide sequences .....                                                                     | 3  |
| Supplemental Table S3: Signal to noise ratios (SNR) of designed universal reporters (PSR) used in the Naica PRISM III..... | 4  |
| Supplemental Table S4: VMR ratios .....                                                                                    | 5  |
| Supplemental Table S5: Absorption and Emission maxima of Fluorophores used in universal reporter (PSR) structures.....     | 6  |
| Supplemental Fig. S1: Annealing temperature gradient .....                                                                 | 7  |
| Supplemental Fig. S2: Two-plex Primer titration .....                                                                      | 8  |
| Supplemental Fig. S3: Two-plex MP:PSR titration .....                                                                      | 9  |
| Supplemental Fig. S4. Combination of leading conditions.....                                                               | 9  |
| Supplemental Fig. S5: KRAS Four-plex REM-dPCR in condition C2 .....                                                        | 10 |
| Supplemental Fig. S6: KRAS four-plex titration .....                                                                       | 11 |
| REFERENCES.....                                                                                                            | 12 |

**SUPPLEMENTAL TABLE S1: TARGET PANEL.**

Table S1 In the target region mutations are highlighted in red, complementary probe binding regions are highlighted in yellow and red.

| Target | Gene | Name  | Codon | Target region (5' → 3') |    |   |   |   |   |   |   |   |           | Change of nucleotide | Change of amino acid | Library number (NCBI) | Chromosome / position | Detection channel | PSR-Type |
|--------|------|-------|-------|-------------------------|----|---|---|---|---|---|---|---|-----------|----------------------|----------------------|-----------------------|-----------------------|-------------------|----------|
| I      | BRAF | WT    | 600   | T                       | T  | T | C | A | C | T | G | T | WT        |                      |                      |                       | blue                  | 08                |          |
| II     |      | V600E | 600   | T                       | T  | T | C | T | C | T | G | T | c.1799T>A | p.Val600Glu          | rs113488022          | GRch38 Chr7:140753336 | blue                  | 07                |          |
| III    | KRAS | WT    | 12    | G                       | C  | T | G | G | T | G | G | C | WT        |                      |                      |                       | green                 | 02                |          |
|        |      |       |       | infra-red               | 06 |   |   |   |   |   |   |   |           |                      |                      |                       |                       |                   |          |
| IV     | KRAS | G12A  | 12    | G                       | C  | T | G | C | T | G | G | C | c.35G>A   | p.Gly12Asp           | rs121913529          | GRch38 Chr12:25245350 | green                 | 04                |          |
| V      |      | G12D  | 12    | G                       | C  | T | G | A | T | G | G | C | c.35G>C   | p.Gly12Ala           | rs121913529          | GRch38 Chr12:25245350 | red                   | 05                |          |
| VI     |      | G12V  | 12    | G                       | C  | T | G | T | T | G | G | C | c.35G>T   | p.Gly12Val           | rs121913529          | GRch38 Chr12:25245350 | red                   | 06                |          |
|        |      |       |       |                         |    |   |   |   |   |   |   |   |           |                      |                      |                       | infra-red             | 01                |          |

## SUPPLEMENTAL TABLE S2: OLIGONUCLEOTIDE SEQUENCES

Table S2 Sequences of primer, mediator probes, universal reporters and synthetic templates. Point mutations are highlighted in red.

| Oligo-type                   | Name                            | Sequence (5' - 3')                                     | Modifications |          |                  |
|------------------------------|---------------------------------|--------------------------------------------------------|---------------|----------|------------------|
|                              |                                 |                                                        | 5'- end       | 3'- end  | Internal (2/7/8) |
| Primer                       | KRAS_fwd <sup>1</sup>           | GGCCTGCTGAAAATGACT                                     |               |          |                  |
|                              | KRAS_rev <sup>1</sup>           | ACAAAATGATTCTGAATTAGCTGTA                              |               |          |                  |
|                              | BRAF_fwd <sup>2</sup>           | GACCCACTCCATCGAGATTTTC                                 |               |          |                  |
|                              | BRAF_rev <sup>2</sup>           | GCTTGCTCTGATAGGAAAATGAG                                |               |          |                  |
| Mediator probe               | MP_PSR01_KRAS_G12V              | TCGTTCTGGGCTTGGCGTAGGCAAGAGTGCCTTGACGAT                |               | MP-block |                  |
|                              | MP_PSR04_KRAS_G12A <sup>2</sup> | GATACAGGGTCCACTGGCGTAGGCAAGAGTGCCTTGACG                |               | MP-block |                  |
|                              | MP_PSR05_KRAS_G12D <sup>1</sup> | ATGTCCCAGGTGCATGGCGTAGGCAAGAGTGCCTTGACGAT              |               | MP-block |                  |
|                              | MP_PSR06_KRAS_G12V <sup>1</sup> | AGGTAGGCTCACTTGGCGTAGGCAAGAGTGCCTTGACGAT               |               | MP-block |                  |
|                              | MP_PSR06_KRAS_WT                | TAGGCTCACTGAACCAGCTCCAACCTACCACAAGTTTATATTCAG          |               | MP-block |                  |
|                              | MP_PSR07_BRAF_V600E             | ACATGCTCATGTTGTGTCTGTAGCTAGACCAAATCACCTATTTTTACTGTGAG  |               | MP-block |                  |
|                              | MP_PSR08_BRAF_WT                | GTGTTCCCTCACATGCTACTGTAGCTAGACCAAATCACCTATTTTTACTGTGAG |               | MP-block |                  |
| Population Specific Reporter | PSR01                           | GACCGGCCAAGACGCGCCGGT7TGTTGGTCGTAGAGCCAGAACGA          | BHQ-2         | UR-block | dC-Cy5.5         |
|                              | PSR02                           | GACCGGCCAAGACGCGCCGGT7TGTTCACTGACCGAACTGGAGCA          | BMN-Q1        | UR-block | dC-DY-530        |
|                              | PSR04                           | GACCGCACTAGTAGATGCGGT7GTCTGTTGACCTGTATCGAGCA           | BHQ-1         | UR-block | dC-BMN536        |
|                              | PSR05                           | GACCGGCTAAGACGCGCCGGT7TGTTGCACCTGGGACATCGACTAT         | BHQ-2         | UR-block | dC-Cy5           |
|                              | PSR06                           | GACGCGTAGTACAGAACGCGT7TGTTCACTGAGCCTACCTGCCTTC         | BHQ-2         | UR-block | dC-Atto 647N     |
|                              | PSR06                           | GACGCGTAGTACAGAACGCGT2TGTTCACTGAGCCTACCTGCCTTC         | BHQ-2         | UR-block | dC-Atto-680      |
|                              | PSR07                           | ATGCCGATTAGATGCGGCA8TCGATCACACAACATGAGCATGTGTAC        | BHQ-1         | UR-block | dT-FAM           |
|                              | PSR08                           | ATCCGCCAAGACGCGCGGA8TAGCATGTGAGGAACACGATGACAC          | BMN-Q1        | UR-block | dT-Atto 488      |

| Oligo-type         | Name       | Sequence (5'-3')                                                                                                                                                |
|--------------------|------------|-----------------------------------------------------------------------------------------------------------------------------------------------------------------|
| Synthetic template | KRAS_WT    | CATTTTCATTATTTTTATTATAAGGCCTGCTGAAAATGACTGAATATAAACTTGTGGTAGTTGGAGCTGGTGGCGTAGGCAAGAGTGCCTTGACGATACAGCTAATTCAGAATCATTTTGTGGACGAATAT                             |
|                    | KRAS_G12A  | CATTTTCATTATTTTTATTATAAGGCCTGCTGAAAATGACTGAATATAAACTTGTGGTAGTTGGAGCTGCTGGCGTAGGCAAGAGTGCCTTGACGATACAGCTAATTCAGAATCATTTTGTGGACGAATAT                             |
|                    | KRAS_G12D  | CATTTTCATTATTTTTATTATAAGGCCTGCTGAAAATGACTGAATATAAACTTGTGGTAGTTGGAGCTGATGGCGTAGGCAAGAGTGCCTTGACGATACAGCTAATTCAGAATCATTTTGTGGACGAATAT                             |
|                    | KRAS_G12V  | CATTTTCATTATTTTTATTATAAGGCCTGCTGAAAATGACTGAATATAAACTTGTGGTAGTTGGAGCTGTTGGCGTAGGCAAGAGTGCCTTGACGATACAGCTAATTCAGAATCATTTTGTGGACGAATAT                             |
|                    | BRAF_WT    | CAAACCTGATGGGACCCACTCCATCGAGATTTCACTGTAGCTAGACCAAATCACCTATTTTTACTGTGAGGTCTTCATGAAGAAATATATCTGAGGTGTAGTAAGTAAAGGAAAACAGTAGATCTCATTTTCTATCAGAGCAAGCATTATGAAGAGTTT |
|                    | BRAF_V600E | CAAACCTGATGGGACCCACTCCATCGAGATTTCTGTAGCTAGACCAAATCACCTATTTTTACTGTGAGGTCTTCATGAAGAAATATATCTGAGGTGTAGTAAGTAAAGGAAAACAGTAGATCTCATTTTCTATCAGAGCAAGCATTATGAAGAGTTT   |

### SUPPLEMENTAL TABLE S3: SIGNAL TO NOISE RATIOS (SNR) OF DESIGNED UNIVERSAL REPORTERS (PSR) USED IN THE NAICA PRISM III

Table S3: SNR ± STD were determined in a mediator extension assay<sup>3</sup> using following conditions: 150 nM mediator; 100 nM PSR. Mediator extension assay was performed in a qPCR cyclor (RotorGeneQ from Qiagen) with following PCR setting: 300 s at 95°C initial denaturation, followed by 45 cycles 95°C 5 s and 60°C 30 s. Signals were acquired at 28°C; values were taken from a melting curve measurement. Both signal and noise represent values of technical triplicates (n=3).

| PSR:        | PSR07      | PSR08      | PSR02      | PSR04      | PSR05      | PSR06      |
|-------------|------------|------------|------------|------------|------------|------------|
| Fluorophore | FAM        | Atto 488   | DY-530     | BMN536     | CY5        | Atto 647N  |
| Quencher    | BHQ-1      | BMN-Q1     | BMN-Q1     | BHQ-1      | BHQ-2      | BHQ-2      |
| SNR:        | 41.4 ± 6.5 | 15.5 ± 1.0 | 26.8 ± 2.3 | 16.0 ± 1.1 | 82.6 ± 1.6 | 63.3 ± 2.5 |

**SUPPLEMENTAL TABLE S4: VMR RATIOS**

Table S4 Variance to mean ratios (VMR) of leading duplex oligonucleotide titration conditions.

| Primer          |                 | MP<br>[nM] | PSR<br>[nM] | No. of positive<br>droplet<br>population | Mean | Variance | VMR<br>( $\times 10^2$ ) | Significance test | Condition                                                     |
|-----------------|-----------------|------------|-------------|------------------------------------------|------|----------|--------------------------|-------------------|---------------------------------------------------------------|
| forward<br>[nM] | reverse<br>[nM] |            |             |                                          |      |          |                          |                   |                                                               |
| <b>500</b>      | 500             | 1200       | 400         | 2,417                                    | 1.14 | 0.15     | 12.89                    | 46,097            | Primer titration<br>(Fig. S2)                                 |
| <b>750</b>      | 500             | 1200       | 400         | 2,683                                    | 1.15 | 0.17     | 14.92                    | 42,521            |                                                               |
| <b>1000</b>     | 500             | 1200       | 400         | 2,598                                    | 1.16 | 0.18     | 15.38                    | 50,693            |                                                               |
| <b>1250</b>     | 500             | 1200       | 400         | 2,646                                    | 1.17 | 0.20     | 17.18                    | 54,715            |                                                               |
| <b>500</b>      | 1200            | 1400       | 600         | 2,918                                    | 1.15 | 0.18     | 15.46                    | 30,057            | MP:PSR titration<br>(Fig. S3)                                 |
| <b>500</b>      | 1200            | 1200       | 600         | 3,050                                    | 1.19 | 0.23     | 19.07                    | 32,772            |                                                               |
| <b>500</b>      | 1200            | 1000       | 600         | 2,952                                    | 1.14 | 0.16     | 13.62                    | 32,290            |                                                               |
| <b>500</b>      | 1200            | 800        | 600         | 3,036                                    | 1.18 | 0.21     | 18.12                    | 25,705            |                                                               |
| <b>1000</b>     | 500             | 1200       | 600         | 2,967                                    | 1.23 | 0.27     | 22.12                    | 58,628            | Combination of<br>primer and<br>MP:PSR titration<br>(Fig. S4) |
| <b>1000</b>     | 500             | 800        | 400         | 3,009                                    | 1.22 | 0.27     | 22.10                    | 35,318            |                                                               |
| <b>1250</b>     | 500             | 1200       | 600         | 3,183                                    | 1.22 | 0.27     | 22.07                    | 39,323            |                                                               |
| <b>1250</b>     | 500             | 600        | 400         | 3,112                                    | 1.20 | 0.21     | 20.57                    | 39,323            |                                                               |

| Primer       |              | MP [nM] | PSR [nM] | No. of positive droplet population | Mean | Variance | VMR ( $\times 10^2$ ) | Significance test | Condition |    |
|--------------|--------------|---------|----------|------------------------------------|------|----------|-----------------------|-------------------|-----------|----|
| forward [nM] | reverse [nM] |         |          |                                    |      |          |                       |                   |           |    |
| 1,000        | 1,000        | 1,000   | 250      | 2,966                              | 1,34 | 0,38     | 28.64                 | 29,456            | Blue      | C1 |
| 1,000        | 1,000        | 1,000   | 250      | 2,254                              | 1.21 | 0.24     | 20.11                 | 26,768            | Green     |    |
| 1,000        | 1,000        | 1,000   | 250      | 4,718                              | 1.31 | 0.28     | 28.13                 | 22,717            | Red       |    |
| 1,000        | 500          | 1,200   | 600      | 4,978                              | 1.68 | 1,03     | 61.09                 | 25,851            | Blue      | C2 |
| 1,000        | 500          | 1,200   | 600      | 4,795                              | 1.17 | 0.19     | 16.07                 | 53,195            | Green     |    |
| 1,000        | 500          | 1,200   | 600      | 2,902                              | 1.22 | 0.26     | 20.93                 | 35,283            | Red       |    |

Two-plex REM Fig. 2

**SUPPLEMENTAL TABLE S5: ABSORPTION AND EMISSION MAXIMA OF FLUOROPHORES USED IN UNIVERSAL REPORTER (PSR) STRUCTURES**

Table S5: Maxima absorption and emission wavelengths in nm according to the website of the PSR manufacturer.

| Fluorophore             | FAM | Atto 488 | BMN536 | DY-530 | Atto 647N | Cy5 | Cy5.5 | Atto-680 |
|-------------------------|-----|----------|--------|--------|-----------|-----|-------|----------|
| Maximum absorption [nm] | 494 | 501      | 536    | 539    | 646       | 649 | 675   | 680      |
| Maximum emission [nm]   | 520 | 523      | 553    | 561    | 664       | 670 | 694   | 700      |

**SUPPLEMENTAL FIG. S1: ANNEALING TEMPERATURE GRADIENT**

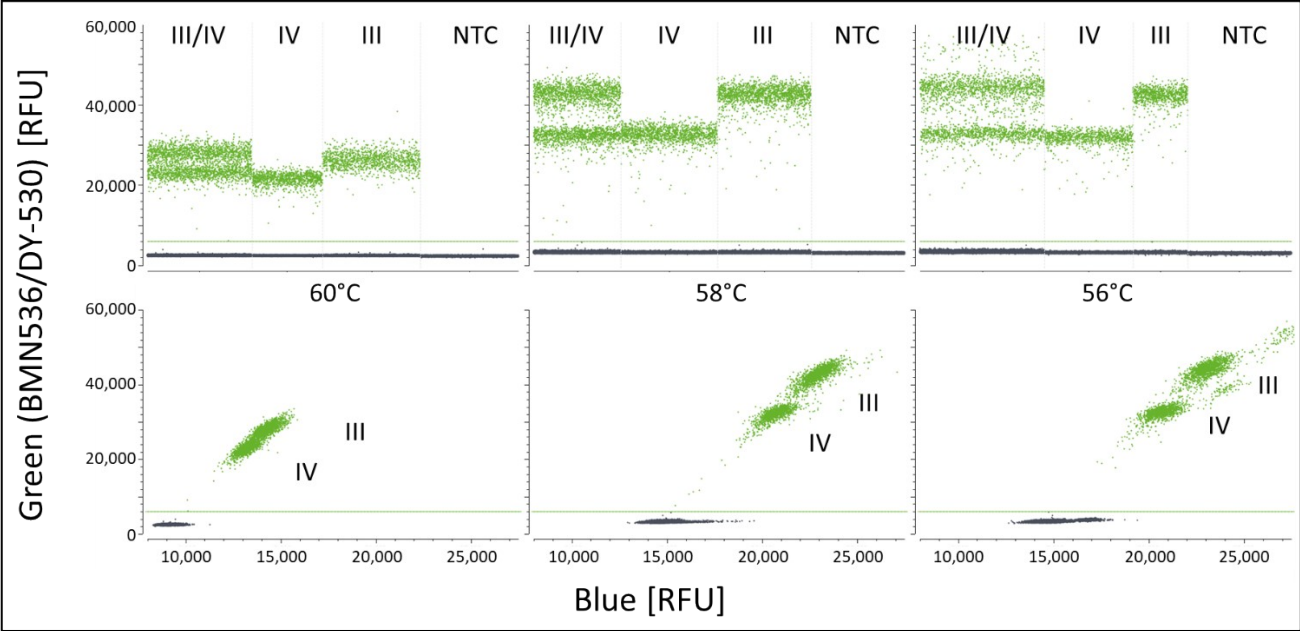

Fig. S1 1D and corresponding 2D scatterplots of two-plex REM-dPCR with changing annealing and extension temperatures targeting KRAS WT (III), KRAS G12A (IV). Threshold was set at same intensities (6,000 RFU) in all conditions, indicated by green line. Green populations were positive, negative droplets are indicated in dark grey.

**SUPPLEMENTAL FIG. S2: TWO-PLEX PRIMER TITRATION**

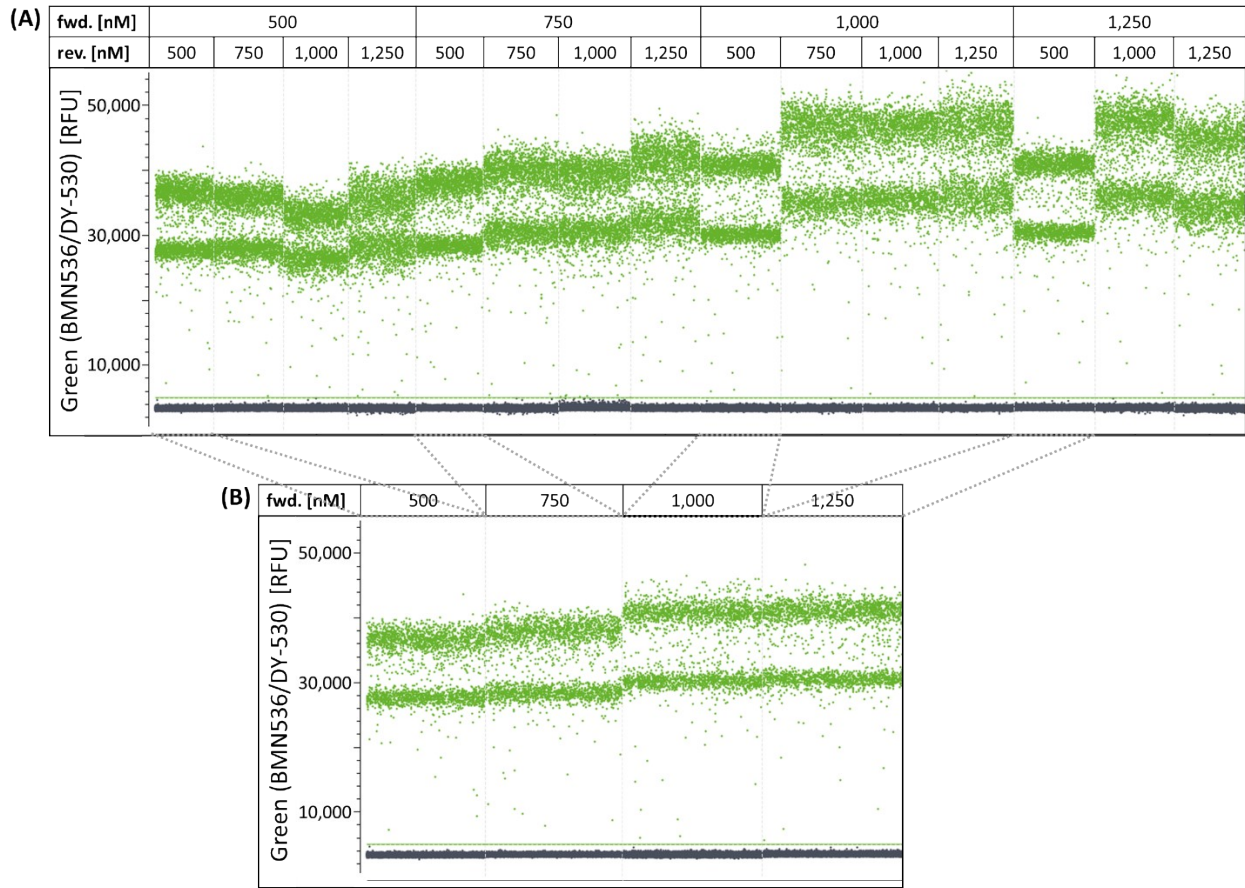

**Fig. S2.** 1D scatterplots of the two-plex REM-dPCR primer titration targeting KRAS WT (III, upper population), KRAS G12A (IV, lower population) **(A)**. Negative populations are highlighted in dark grey and positive populations in green. **(B)** Leading conditions of the primer titration. All conditions had 500 nM reverse primer with the different forward primer concentrations indicated at top of the graph. Threshold are indicated with a dashed green line. See Table S4 for VMR analysis.



**SUPPLEMENTAL FIG. S3: TWO-PLEX MP:PSR TITRATION**

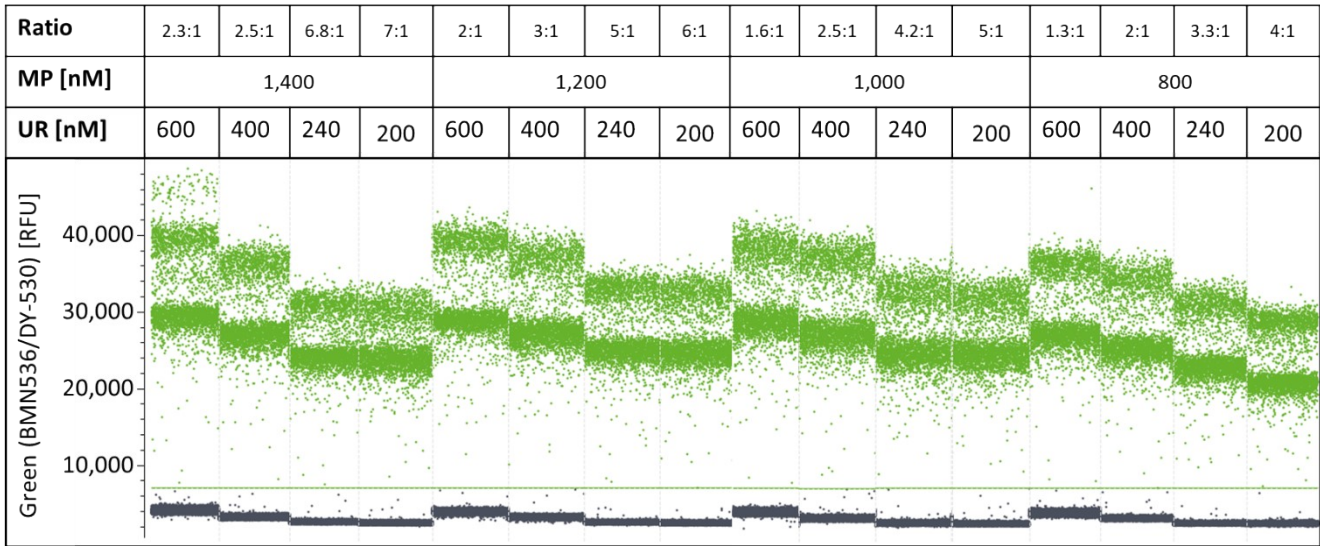

**Fig. S3** 1D scatterplots of the two-plex REM-dPCR MP:PSR titration targeting KRAS WT (III, upper population), KRAS G12A (IV, lower population). Threshold is displayed as a green dashed line, negative populations are highlighted in dark grey and positive populations in green. See Table S4 for VMR analysis for leading conditions with 600 nM PSR.

**SUPPLEMENTAL FIG. S4. COMBINATION OF LEADING CONDITIONS**

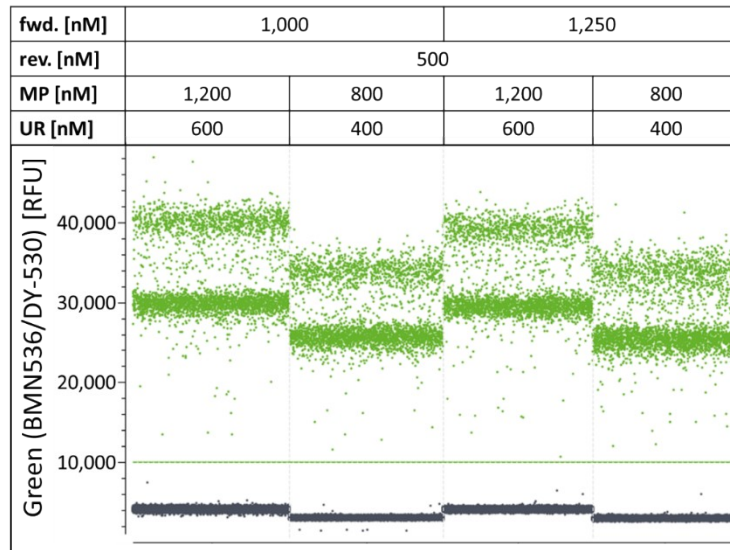

**Fig. S4** Two-plex REM-dPCR comparing leading conditions of the MP:PSR and primer titration targeting KRAS WT (III, upper population), KRAS G12A (IV, lower population). The threshold was indicated with a green dashed line. The reactions were separated by perpendicular dashed light grey lines. See Table S4 for VMR analysis.

SUPPLEMENTAL FIG. S5: KRAS FOUR-PLEX REM-dPCR IN CONDITION C2

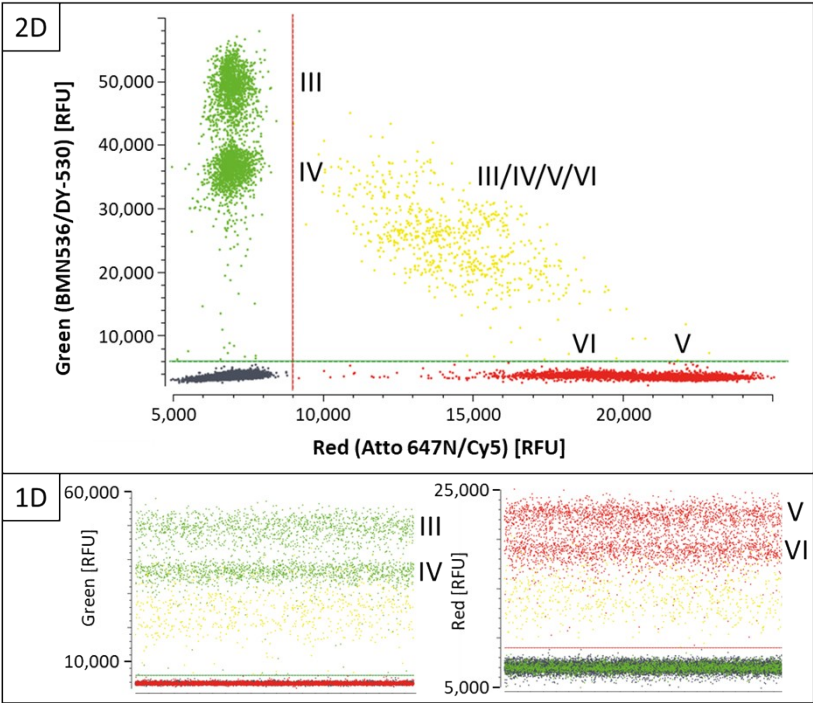

**Fig. S5** Four-plex REM-dPCR scatterplots with condition C2 assay parameters targeting KRAS WT (III), KRAS G12A (IV) in the green channel and KRAS G12D (V) and KRAS G12V (VI) in the red channel. Double positive are indicated in yellow. Thresholds are indicated as a green and red line in the figure. Results are shown in 1D and 2D for the respective channels and channel combinations.

SUPPLEMENTAL FIG. S6: KRAS FOUR-PLEX TITRATION

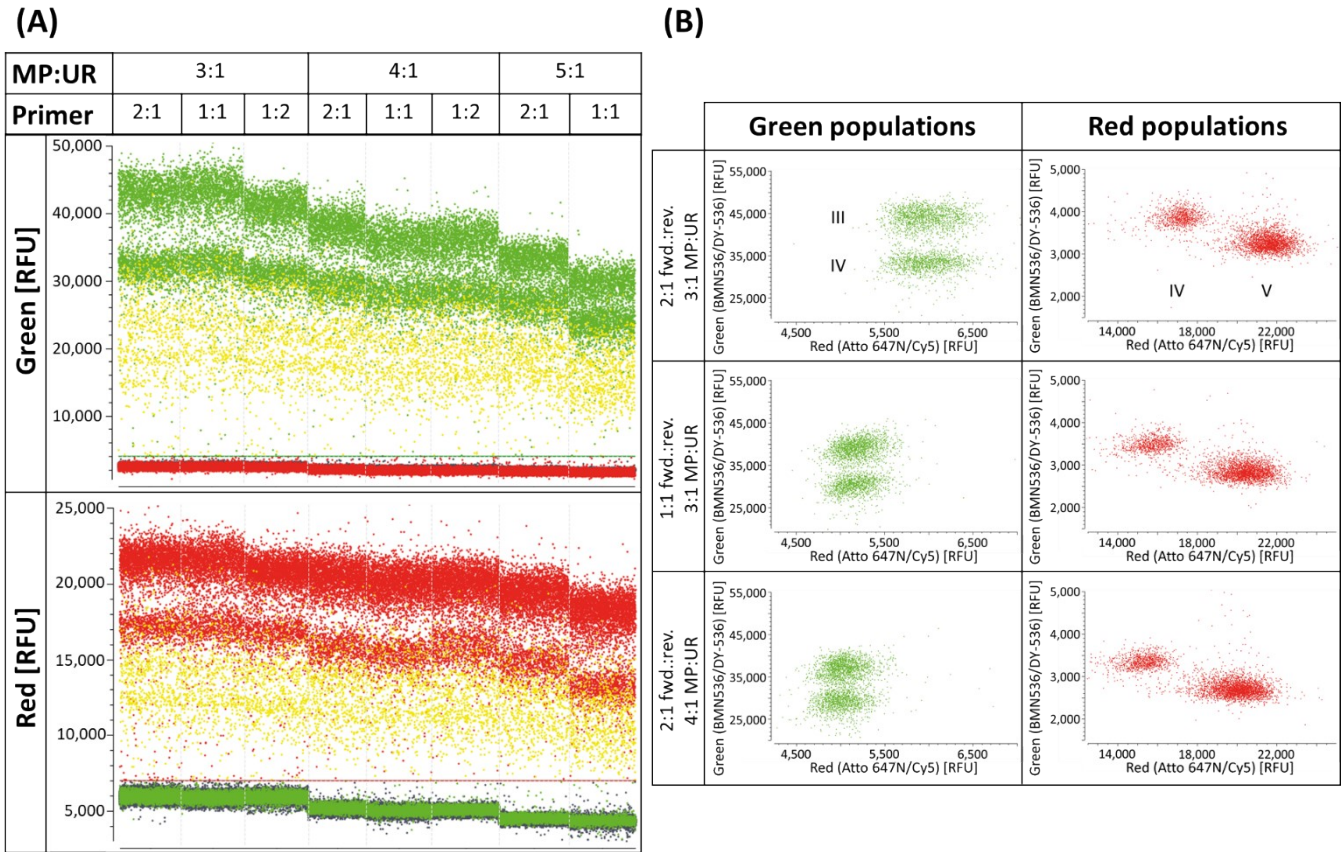

**Fig. S6** Four-plex REM-dPCR scatterplots of MP, PSR and primer titrations targeting KRAS WT (III), KRAS G12A (IV) in the green channel and KRAS G12D (V) and KRAS G12V (VI) in the red channel **(A)**. Double positive are indicated in yellow. Thresholds are indicated as a green and red line in the figure. **(B)** Zoom in of leading conditions of the titrations showing 2D plots in the green and red channel.

## REFERENCES

- 1 F. Schlenker, E. Kipf, N. Borst, T. Hutzenlaub, R. Zengerle, F. von Stetten and P. Juelg, *Analytical Chemistry*, 2021, **93**, 10538–10545.
- 2 F. Schlenker, E. Kipf, M. Deuter, I. Höffkes, M. Lehnert, R. Zengerle, F. von Stetten, F. Scherer, J. Wehrle, N. von Bubnoff, P. Juelg, T. Hutzenlaub and N. Borst, *Cancers*, 2021, **13**.
- 3 M. Lehnert, E. Kipf, F. Schlenker, N. Borst, R. Zengerle and F. von Stetten, *Anal. Methods*, 2018, **10**, 3444–3454.
